# Supplementary material for: Variable Expressivity of the Beckwith-Wiedemann Syndrome in Four Pedigrees Segregating Loss-of-Function Variants of CDKN1C
Source: MDPI journal article supplement (doi:10.3390/genes12050706), 2021-05-09
Supplement: s1 [file s1]

**Table S2.** Primer pairs and PCR conditions used for *CDKN1C* amplification

| Primer pairs [7]                                              | Amplicon | Touchdown | Program      |               |               |               |        |              |
|---------------------------------------------------------------|----------|-----------|--------------|---------------|---------------|---------------|--------|--------------|
|                                                               |          |           | iD           | D             | A             | E             | Cycles | fE           |
| 5'-CGTTCCACAGGCCAAGTGCG-3'<br>5'-GCTGGTGCGCACTAGTACTG-3'      | 373 bp   | -         | 95°C<br>5min | 95°C<br>45sec | 62°C<br>45sec | 72°C<br>45sec | 35     | 72°C<br>5min |
| 5'-CGTCCCTCCGCAGCACATCC-3'<br>5'-CCTGCACCGTCTCGCGGTAG-3'      | 278 bp   | -         | 95°C<br>5min | 95°C<br>45sec | 60°C<br>45sec | 72°C<br>45sec | 35     | 72°C<br>5min |
| 5'-ACGCCTGCAGTGGACCGAAGTGGA-3'<br>5'-GGAACCCAGCGAGGCCCCCGA-3' | 688 bp   | +         | 95°C<br>5min | 95°C<br>45sec | 70°C<br>45sec | 72°C<br>45sec | 5      | 72°C<br>5min |
|                                                               |          |           |              | 95°C<br>45sec | 68°C<br>45sec | 72°C<br>45sec | 10     |              |
|                                                               |          |           |              | 95°C<br>45sec | 64°C<br>45sec | 72°C<br>45sec | 20     |              |
| 5'-CCCTCTCCCGGCCCCCTCTCG-3'<br>5'-CGCCGCCGGTTGCTGCTACATG-3'   | 391bp    | +         | 95°C<br>5min | 95°C<br>45sec | 70°C<br>45sec | 72°C<br>45sec | 5      | 72°C<br>5min |
|                                                               |          |           |              | 95°C<br>45sec | 68°C<br>45sec | 72°C<br>45sec | 10     |              |
|                                                               |          |           |              | 95°C<br>45sec | 64°C<br>45sec | 72°C<br>45sec | 20     |              |

iD: initial Denaturation; D: Denaturation; A: Annealing; E: Extention; fE: final Extention
