# Supplementary material for: Variable Expressivity of the Beckwith-Wiedemann Syndrome in Four Pedigrees Segregating Loss-of-Function Variants of CDKN1C
Source: MDPI journal article supplement (doi:10.3390/genes12050706), 2021-05-09
Supplement: s1 [file s1]

**Table S1.** Consensus scoring system of Beckwith-Wiedemann syndrome

| Clinical Features                                                                        | Points<br>(cut-off $\geq 4$ for clinical diagnosis of<br>BWS patients [9]) | Points<br>(cut-off $\geq 3$ for molecular testing of<br>suspected prenatal BWS cases [12]) |
|------------------------------------------------------------------------------------------|----------------------------------------------------------------------------|--------------------------------------------------------------------------------------------|
| Macroglossia                                                                             | 2                                                                          | 3                                                                                          |
| Exomphalos                                                                               | 2                                                                          | 3                                                                                          |
| Lateralized overgrowth                                                                   | 2                                                                          | -                                                                                          |
| Multifocal and/or bilateral Wilms tumour or<br>nephroblastomatosis                       | 2                                                                          | -                                                                                          |
| Hyperinsulinism lasting >1week                                                           | 2                                                                          | -                                                                                          |
| Adrenal cortex cytomegaly, placental mesenchymal<br>dysplasia or pancreatic adenomatosis | 2                                                                          | 3*                                                                                         |
| Birthweight >2 SDS above the mean                                                        | 1                                                                          | 2                                                                                          |
| Facial naevus simplex                                                                    | 1                                                                          | -                                                                                          |
| Polyhydramnios and/or placentomegaly                                                     | 1                                                                          | 2 points each                                                                              |
| Ear creases and/or pits                                                                  | 1                                                                          | -                                                                                          |
| Transient hypoglycaemia (<1week)                                                         | 1                                                                          | -                                                                                          |
| Typical BWS spectrum tumours                                                             | 1                                                                          | 3                                                                                          |
| Nephromegaly and/or hepatomegaly                                                         | 1                                                                          | 2                                                                                          |
| Umbilical hernia and/or diastasis recti                                                  | 1                                                                          | -                                                                                          |
| Family history of inheritable BWS                                                        | -                                                                          | 3                                                                                          |
| Nephroureteral anomalies                                                                 | -                                                                          | 1                                                                                          |
| Elevated hCG/ $\alpha$ -FP/PAPP-A                                                        | -                                                                          | 1                                                                                          |
| Monozygotic twinning                                                                     | -                                                                          | 1                                                                                          |
| Pregnancy from ART                                                                       | -                                                                          | 1                                                                                          |

\*: For placental mesenchymal dysplasia only.
